# Supplementary material for: Rapid increase in snake dietary diversity and complexity following the end-Cretaceous mass extinction
Source: PubMed Central journal article supplement (PMC8516226; doi:10.1371/journal.pbio.3001414), 2021-10-14

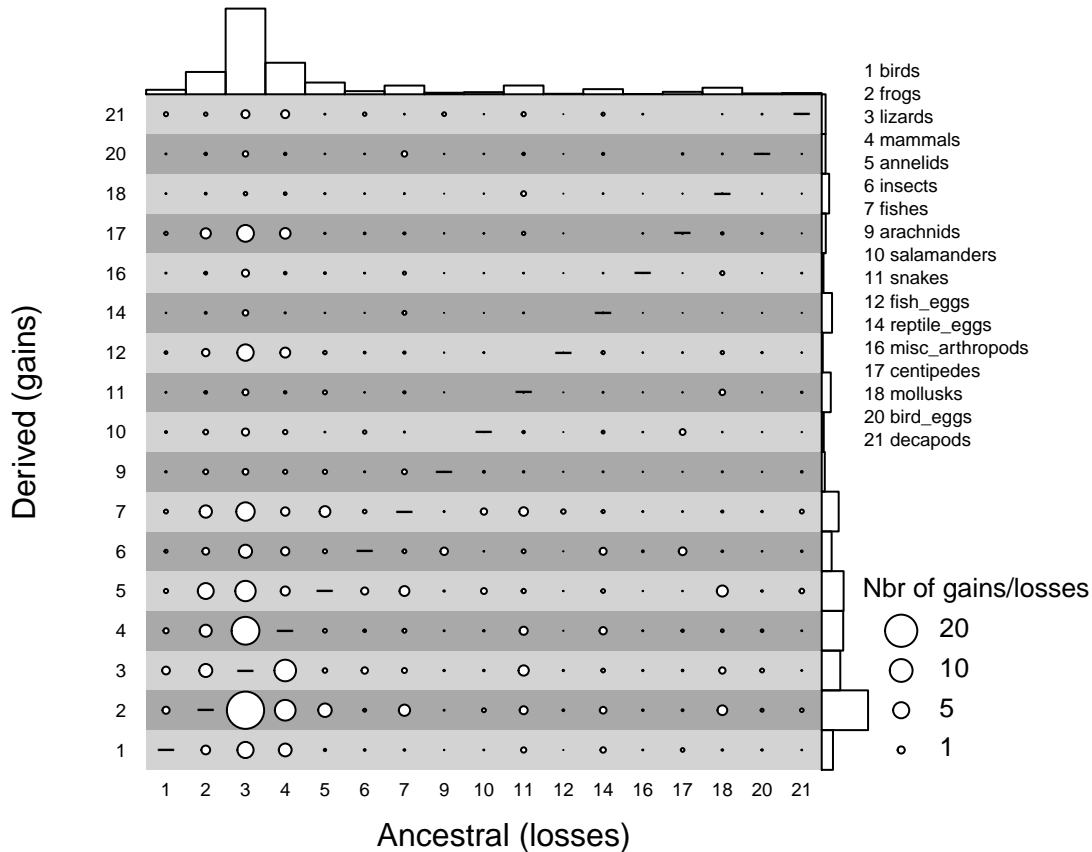

Supplement: pbio.3001414.s004.pdf [file pbio.3001414.s004.pdf]
